# Supplementary material for: Three Complete Mitochondrial Genomes of Orestes guangxiensis, Peruphasma schultei, and Phryganistria guangxiensis (Insecta: Phasmatodea) and Their Phylogeny
Source: MDPI journal article supplement (doi:10.3390/insects12090779), 2021-08-31
Supplement: s1 [file s1]

Table S2. Species of Phasmatodea used to construct the phylogenetic relationships along with SRA numbers.

| Family            | Subfamily         | Species                          | SRA        | Reference |
|-------------------|-------------------|----------------------------------|------------|-----------|
| Pseudophasmatidae | Pseudophasmatinae | <i>Peruphasma schultei</i>       | SRR1002984 | [33]      |
| Heteropterygidae  | Obriminae         | <i>Aretaon asperrimus</i>        | SRR1172270 | [33]      |
| Phylliidae        | Phylliinae        | <i>Phyllium siccifolium</i>      | ERR392012  | [33]      |
| Phasmatidae       | Clitumninae       | <i>Medauroidea extradentata</i>  | SRR1172394 | [33]      |
|                   |                   | <i>Ramulus artemis</i>           | SRR1172422 | [33]      |
|                   | Phasmatinae       | <i>Clitarchus hookeri</i>        | SRR3080266 | [33]      |
|                   |                   | <i>Acanthoxyla</i> sp.           | SRR2089887 | [33]      |
|                   |                   | <i>Argosarchus horridus</i>      | SRR2089902 | [33]      |
| Lonchodidae       | Lonchodinae       | <i>Phraortes</i> sp. YW-2014     | SRR1189755 | [33]      |
|                   | Lonchodinae       | <i>Carausius morosus</i>         | SRR3211828 | [33]      |
| Diapheromeridae   | Pachymorphinae    | <i>Spinotectarchus acornutus</i> | SRR2089897 | [33]      |
|                   |                   | <i>Tectarchus salebrosus</i>     | SRR2089908 | [33]      |
|                   |                   | <i>Tectarchus ovobessus</i>      | SRR2089893 | [33]      |
|                   |                   | <i>Asteliaphasma jucundum</i>    | SRR2089913 | [33]      |
|                   |                   | <i>Micrarchus</i> sp.            | SRR1054193 | [33]      |
|                   |                   | <i>Micrarchus hystriculeus</i>   | SRR1054191 | [33]      |
|                   |                   | <i>Niveaphasma annulatum</i>     | SRR2089878 | [33]      |
