# Supplementary material for: Three Complete Mitochondrial Genomes of Orestes guangxiensis, Peruphasma schultei, and Phryganistria guangxiensis (Insecta: Phasmatodea) and Their Phylogeny
Source: MDPI journal article supplement (doi:10.3390/insects12090779), 2021-08-31
Supplement: s1 [file s1]

Table S1. Specific primers used to amplify the mitogenomes of *O. guangxiensis*, *Pe. schultei* and *Ph. guangxiensis*.

| Species                 | Primer name     | Sequence (5'-3')        | Product length (bp) |
|-------------------------|-----------------|-------------------------|---------------------|
| <i>O. guangxiensis</i>  | 11ZJC25-J-503   | GTATTTCTCCATTTCCT       | 1,700               |
|                         | 11ZJC25-N-2246  | TGTAGTTTGAGCACATCACA    |                     |
|                         | 11ZJC25-J-3295  | TATAAAAGCAGTAGGACAT     | 4,200               |
|                         | 11ZJC25-N-7500  | CATTCTATCACCAATACG      |                     |
|                         | 11ZJC25-J-7310  | ATACAGGGGTAGGAGCA       | 2,800               |
|                         | 11ZJC25-N-11076 | CAACCAGAATGATATTTTC     |                     |
|                         | 11ZJC25-J-11023 | CCGCAAATCCCCTAGTAA      | 3,000               |
|                         | 11ZJC25-N-14056 | GCACCTTGACCTGAAATATA    |                     |
|                         | 11ZJC25-J-14065 | ATAAGCTGCACCTTGACC      | 2,500               |
|                         | 11ZJC25-N-387   | ACAAACTATTGCATCAATA     |                     |
| <i>Pe. schultei</i>     | ZJC5-J-530      | ATTTACCTTTTCATTTTT      | 1,900               |
|                         | ZJC5-N-2438     | TTCTTATTCACTCTTGGTGG    |                     |
|                         | ZJC5-J-3034     | GCAAGATAGATCCTCACCTC    | 4,300               |
|                         | ZJC5-N-7362     | ATCAAGGTGAAAAAGGAAT     |                     |
|                         | ZJC5-J-7354     | GCTGGTAATCAGGGAGAA      | 3,700               |
|                         | ZJC5-N-11017    | AAGAGACCCGGATAATTTTAC   |                     |
|                         | ZJC5-J-11022    | GCAAACCCTTTAGTAACACC    | 2,300               |
|                         | ZJC5-N-13493    | GCGAATAGCATATCACATCTAAG |                     |
|                         | ZJC5-J-14032    | AATTATAAGCTGCACCTTG     | 2,000               |
|                         | ZJC5-N-358      | TATCTAAAGAATCCGCTT      |                     |
| <i>Ph. guangxiensis</i> | 11ZJC2-J-773    | TAATGGGTGGATAATAGCAG    | 1,550               |
|                         | 11ZJC2-N-2330   | CTGATGTAAAGTAGGCTCGT    |                     |
|                         | 11ZJC2-J-3071   | CATCGCCAATAATAGAACAAC   | 4,300               |
|                         | 11ZJC2-N-7337   | CACCCACTCCTGTATCATCTT   |                     |
|                         | 11ZJC2-J-9079   | GAGAAAGCAACAAACAAAAT    | 1,700               |
|                         | 11ZJC2-N-10780  | TTATCTACAGCGAAACCC      |                     |
|                         | 11ZJC2-J-13047  | AATGATTATGCTACCTTTG     | 1,000               |
|                         | 11ZJC2-N-13994  | TGAAGGTGGATTGATAGT      |                     |
|                         | 11ZJC2-J-14320  | AATCCTAGTTTACCGCTTAT    | 3,200               |
|                         | 11ZJC2-N-567    | GTTTCTCCTGTATTCTTG      |                     |
