# Supplementary material for: Three Complete Mitochondrial Genomes of Orestes guangxiensis, Peruphasma schultei, and Phryganistria guangxiensis (Insecta: Phasmatodea) and Their Phylogeny
Source: MDPI journal article supplement (doi:10.3390/insects12090779), 2021-08-31
Supplement: s1 [file s1]

Table S3. Location of features in the mtDNA of *O. guangxiensis*

| Gene                      | Strand | Position    | Length<br>(nuc.) | Anticodon | Start<br>codon | Stop<br>codon | Intergenic<br>nucleotides |
|---------------------------|--------|-------------|------------------|-----------|----------------|---------------|---------------------------|
| tRNA <sup>Ile</sup>       | +      | 1-67        | 67               | ATC       |                |               | 0                         |
| tRNA <sup>Gln</sup>       | -      | 65-133      | 66               | CAA       |                |               | -1                        |
| tRNA <sup>Met</sup>       | +      | 133-198     | 66               | ATG       |                |               | 0                         |
| ND2                       | +      | 199-1206    | 1008             |           | ATA            | TAA           | -2                        |
| tRNA <sup>Trp</sup>       | +      | 1205-1268   | 64               | TGA       |                |               | -8                        |
| tRNA <sup>Cys</sup>       | -      | 1261-1327   | 67               | TGC       |                |               | 2                         |
| tRNA <sup>Tyr</sup>       | -      | 1330-1396   | 67               | TAC       |                |               | 1                         |
| COI                       | +      | 1398-2936   | 1539             |           | ATG            | TAA           | -5                        |
| tRNA <sup>Leu2(UUA)</sup> | +      | 2932-2994   | 63               | TTA       |                |               | 0                         |
| COII                      | +      | 2995-3664   | 670              |           | ATA            | T             | 0                         |
| tRNA <sup>Lys</sup>       | +      | 3665-3734   | 70               | AAG       |                |               | -1                        |
| tRNA <sup>Asp</sup>       | +      | 3734-3801   | 68               | GAC       |                |               | 1                         |
| ATP8                      | +      | 3803-3964   | 162              |           | ATA            | TAA           | -4                        |
| ATP6                      | +      | 3961-4635   | 675              |           | ATA            | TAA           | -1                        |
| COIII                     | +      | 4635-5420   | 786              |           | ATG            | TAA           | -1                        |
| tRNA <sup>Gly</sup>       | +      | 5420-5484   | 65               | GGA       |                |               | 0                         |
| ND3                       | +      | 5485-5836   | 352              |           | ATA            | T             | 0                         |
| tRNA <sup>Ala</sup>       | +      | 5837-5903   | 67               | GCA       |                |               | 1                         |
| tRNA <sup>Arg</sup>       | +      | 5905-5973   | 69               | CGA       |                |               | 0                         |
| tRNA <sup>Asn</sup>       | +      | 5974-6039   | 66               | AAC       |                |               | 0                         |
| tRNA <sup>Ser1</sup>      | +      | 6040-6107   | 68               | AGC       |                |               | 0                         |
| tRNA <sup>Glu</sup>       | +      | 6108-6172   | 65               | GAA       |                |               | -2                        |
| tRNA <sup>Phe</sup>       | -      | 6171-6238   | 68               | TTC       |                |               | 0                         |
| ND5                       | -      | 6239-7958   | 1720             |           | ATT            | T             | 3                         |
| tRNA <sup>His</sup>       | -      | 7962-8027   | 66               | CAC       |                |               | -1                        |
| ND4                       | -      | 8027-9358   | 1332             |           | ATG            | TAA           | -7                        |
| ND4L                      | -      | 9352-9636   | 285              |           | ATA            | TAA           | 8                         |
| tRNA <sup>Thr</sup>       | +      | 9645-9706   | 62               | ACA       |                |               | 0                         |
| tRNA <sup>Pro</sup>       | -      | 9707-9771   | 65               | CCA       |                |               | 1                         |
| ND6                       | +      | 9773-10252  | 480              |           | ATT            | TAA           | 0                         |
| Cyt <i>b</i>              | +      | 10252-11385 | 1134             |           | ATG            | TAA           | -1                        |
| tRNA <sup>Ser2</sup>      | +      | 11385-11449 | 65               | TCA       |                |               | -2                        |
| ND1                       | -      | 11448-12419 | 972              |           | ATA            | TAA           | -3                        |
| tRNA <sup>Leu1(CUA)</sup> | -      | 12417-12483 | 67               | CTA       |                |               | 0                         |
| 16S rRNA                  | -      | 12484-13774 | 1291             |           |                |               | 0                         |
| tRNA <sup>Val</sup>       | -      | 13775-13843 | 69               | GTA       |                |               | 0                         |
| 12S rRNA                  | -      | 13844-14631 | 788              |           |                |               | 0                         |
| CR                        |        | 14632-16869 | 2238             |           |                |               |                           |
