# Supplementary material for: Three Complete Mitochondrial Genomes of Orestes guangxiensis, Peruphasma schultei, and Phryganistria guangxiensis (Insecta: Phasmatodea) and Their Phylogeny
Source: MDPI journal article supplement (doi:10.3390/insects12090779), 2021-08-31
Supplement: s1 [file s1]

**Table S6. Mitochondrial genome comparisons of Phasmatodea species.**

| Family            | Subfamily         | Species                              | Full length<br>(bp) | A (%) (+) | T (%) (+) | C (%) (+) | G (%) (+) | A+T (%) (+) | G+C (%) (+) | AT-skew<br>(+) | GC-skew<br>(+) |
|-------------------|-------------------|--------------------------------------|---------------------|-----------|-----------|-----------|-----------|-------------|-------------|----------------|----------------|
| Pseudophasmatidae | Pseudophasmatinae | <i>Peruphasma schultei</i>           | 15,896              | 44.3      | 32.3      | 13.9      | 9.5       | 76.6        | 23.4        | 0.16           | -0.19          |
| Timematidae       | Timematinae       | <i>Timema californicum</i>           | 14,387              | 38.9      | 33.2      | 16.4      | 11.4      | 72.1        | 27.8        | 0.08           | -0.18          |
| Phylliidae        | Phylliinae        | <i>Cryptophyllum tibetense</i>       | 18,248              | 48        | 28        | 14.2      | 9.8       | 76          | 24          | 0.26           | -0.18          |
| Phylliidae        | Phylliinae        | <i>Pulchriphyllum giganteum</i>      | 13,980              | 47        | 27.6      | 15.5      | 9.9       | 74.6        | 25.4        | 0.26           | -0.22          |
| Phylliidae        | Phylliinae        | <i>Cryptophyllum westwoodii</i>      | 17,222              | 49.2      | 28.4      | 13.4      | 9         | 77.6        | 22.4        | 0.27           | -0.19          |
| Bacillidae        | Bacillinae        | <i>Bacillus rossius</i>              | 14,152              | 45.9      | 31.7      | 13        | 9.4       | 77.6        | 22.4        | 0.18           | -0.16          |
| Bacillidae        | Bacillinae        | <i>Bacillus atticus</i>              | 14,141              | 45.9      | 32.2      | 12.9      | 9.1       | 78.1        | 22          | 0.18           | -0.17          |
| Heteropterygidae  | Dataminae         | <i>Orestes mouhotii</i>              | 16,223              | 44.6      | 29.7      | 16.1      | 9.6       | 74.3        | 25.7        | 0.20           | -0.25          |
| Heteropterygidae  | Heteropteryginae  | <i>Heteropteryx dilatata</i>         | 16,618              | 45.1      | 31        | 14.4      | 9.5       | 76.1        | 23.9        | 0.19           | -0.21          |
| Heteropterygidae  | Dataminae         | <i>Orestes guangxiensis</i>          | 16,869              | 44.9      | 30.7      | 14.8      | 9.5       | 75.6        | 24.3        | 0.19           | -0.22          |
| Lonchodidae       | Lonchodinae       | <i>Phraortes elongatus</i>           | 16,456              | 45.7      | 31.9      | 13.1      | 9.3       | 77.6        | 22.4        | 0.18           | -0.17          |
| Lonchodidae       | Necrosciinae      | <i>Micadina phluctainoides</i>       | 16,507              | 45.7      | 32.7      | 11.8      | 9.7       | 78.4        | 21.5        | 0.17           | -0.10          |
| Lonchodidae       | Necrosciinae      | <i>Sipyloidea sipyus</i>             | 17,001              | 45.6      | 31.7      | 13.4      | 9.3       | 77.3        | 22.7        | 0.18           | -0.18          |
| Lonchodidae       | Lonchodinae       | <i>Megalophasma granulatum</i>       | 15,275              | 43.8      | 31        | 14.9      | 9.7       | 74.8        | 24.6        | 0.17           | -0.21          |
| Lonchodidae       | Lonchodinae       | <i>Phraortes</i> sp. Miyako Island   | 14,913              | 45.8      | 31.8      | 13.2      | 9.2       | 77.6        | 22.4        | 0.18           | -0.18          |
| Lonchodidae       | Lonchodinae       | <i>Eurycantha calcarata</i>          | 16,280              | 45        | 33.2      | 13.3      | 8.5       | 78.2        | 21.8        | 0.15           | -0.22          |
| Lonchodidae       | Necrosciinae      | <i>Calvisia medogensis</i>           | 16,107              | 44.9      | 31.8      | 13.5      | 9.2       | 76.7        | 22.7        | 0.17           | -0.19          |
| Lonchodidae       | Necrosciinae      | <i>Neohirasea japonica</i>           | 15,305              | 45.8      | 33.6      | 12        | 8.5       | 79.4        | 20.5        | 0.15           | -0.17          |
| Lonchodidae       | Lonchodinae       | <i>Phraortes</i> sp. Iriomote Island | 16,867              | 46.6      | 32.2      | 12.1      | 9.1       | 78.8        | 21.2        | 0.18           | -0.14          |
| Lonchodidae       | Lonchodinae       | <i>Phraortes</i> sp. 1 NS-2020       | 14,207              | 44.9      | 30.8      | 13.3      | 9.3       | 75.7        | 22.6        | 0.19           | -0.18          |
| Lonchodidae       | Necrosciinae      | <i>Micadina brachyptera</i>          | 15,879              | 45.1      | 31.1      | 13.8      | 9.7       | 76.2        | 23.5        | 0.18           | -0.17          |
| Phasmatidae       | Clitumninae       | <i>Pharnaciini</i> sp. NS-2020       | 15,192              | 46.1      | 31.9      | 12.7      | 9.2       | 78          | 21.9        | 0.18           | -0.16          |
| Phasmatidae       | Clitumninae       | <i>Phryganistria guangxiensis</i>    | 17,005              | 44.6      | 32.2      | 13.8      | 9.4       | 76.8        | 23.2        | 0.16           | -0.19          |
| Phasmatidae       | Megacraniinae     | <i>Megacrania alpheus</i>            | 17,124              | 46.2      | 30.6      | 13.9      | 9.3       | 76.8        | 23.2        | 0.20           | -0.20          |
| Phasmatidae       | Clitumninae       | <i>Entoria nuda</i>                  | 16,910              | 43.8      | 32.2      | 13.8      | 10.2      | 76          | 24          | 0.15           | -0.15          |
| Phasmatidae       | Clitumninae       | <i>Phobaeticus serratipes</i>        | 16,182              | 45.9      | 31.1      | 14        | 9         | 77          | 23          | 0.19           | -0.22          |
| Phasmatidae       | Clitumninae       | <i>Ramulus hainanense</i>            | 15,590              | 43        | 30.1      | 16.3      | 10.6      | 73.1        | 26.9        | 0.18           | -0.22          |

|             |                 |                              |        |      |      |      |      |      |      |      |       |
|-------------|-----------------|------------------------------|--------|------|------|------|------|------|------|------|-------|
| Phasmatidae | Clitumninae     | <i>Ramulus mikado</i>        | 16,633 | 43.2 | 32.8 | 13.3 | 10.7 | 76   | 24   | 0.14 | -0.11 |
| Phasmatidae | Extatosomatinae | <i>Extatosoma tiaratum</i>   | 16,537 | 45.6 | 30.3 | 15.1 | 8.9  | 75.9 | 24   | 0.20 | -0.26 |
| Phasmatidae | Phasmatinae     | <i>Dryococelus australis</i> | 16,604 | 44.8 | 32.6 | 13   | 9.5  | 77.4 | 22.5 | 0.16 | -0.6  |

---
