# Supplementary material for: Three Complete Mitochondrial Genomes of Orestes guangxiensis, Peruphasma schultei, and Phryganistria guangxiensis (Insecta: Phasmatodea) and Their Phylogeny
Source: MDPI journal article supplement (doi:10.3390/insects12090779), 2021-08-31
Supplement: s1 [file s1]

Table S5. Location of features in the mtDNA of *Ph. guangxiensis*

| Gene                      | Strand | Position    | Length<br>(nuc.) | Anticodon | Start<br>codon | Stop<br>codon | Intergenic<br>nucleotides |
|---------------------------|--------|-------------|------------------|-----------|----------------|---------------|---------------------------|
| tRNA <sup>Ile</sup>       | +      | 1-69        | 69               | ATC       |                |               | -3                        |
| tRNA <sup>Gln</sup>       | -      | 67-135      | 69               | CAA       |                |               | -1                        |
| tRNA <sup>Met</sup>       | +      | 135-200     | 66               | ATG       |                |               | -1                        |
| ND2                       | +      | 201-1219    | 1019             |           | ATT            | TA            | 0                         |
| tRNA <sup>Trp</sup>       | +      | 1219-1288   | 70               | TGA       |                |               | -8                        |
| tRNA <sup>Cys</sup>       | -      | 1281-1344   | 64               | TGC       |                |               | 6                         |
| tRNA <sup>Tyr</sup>       | -      | 1351-1418   | 68               | TAC       |                |               | 1                         |
| COI                       | +      | 1420-2958   | 1539             |           | ATG            | TAA           | -5                        |
| tRNA <sup>Leu2(UUA)</sup> | +      | 2954-3020   | 67               | TTA       |                |               | 0                         |
| COII                      | +      | 3021-3690   | 670              |           | ATA            | T             | 0                         |
| tRNA <sup>Lys</sup>       | +      | 3691-3762   | 72               | AAG       |                |               | -1                        |
| tRNA <sup>Asp</sup>       | +      | 3762-3827   | 66               | GAC       |                |               | 0                         |
| ATP8                      | +      | 3828-3986   | 159              |           | ATT            | TAA           | -4                        |
| ATP6                      | +      | 3983-4657   | 675              |           | ATA            | TAA           | -1                        |
| COIII                     | +      | 4657-5442   | 783              |           | ATG            | TAA           | 2                         |
| tRNA <sup>Gly</sup>       | +      | 5445-5506   | 62               | GGA       |                |               | 0                         |
| ND3                       | +      | 5507-5860   | 354              |           | ATT            | TAG           | 1                         |
| tRNA <sup>Ala</sup>       | +      | 5862-5923   | 62               | GCA       |                |               | 2                         |
| tRNA <sup>Arg</sup>       | +      | 5926-5990   | 65               | CGA       |                |               | 2                         |
| tRNA <sup>Asn</sup>       | +      | 5993-6056   | 64               | AAC       |                |               | 3                         |
| tRNA <sup>Ser1</sup>      | +      | 6060-6124   | 65               | AGC       |                |               | 3                         |
| tRNA <sup>Glu</sup>       | +      | 6128-6189   | 62               | GAA       |                |               | 4                         |
| tRNA <sup>Phe</sup>       | -      | 6194-6259   | 66               | TTC       |                |               | -1                        |
| ND5                       | -      | 6259-7983   | 1725             |           | ATT            | TAG           | 0                         |
| tRNA <sup>His</sup>       | -      | 7984-8049   | 66               | CAC       |                |               | 1                         |
| ND4                       | -      | 8051-9382   | 1332             |           | ATG            | TAG           | -7                        |
| ND4L                      | -      | 9376-9660   | 285              |           | ATA            | TAA           | 7                         |
| tRNA <sup>Thr</sup>       | +      | 9668-9730   | 63               | ACA       |                |               | 0                         |
| tRNA <sup>Pro</sup>       | -      | 9731-9801   | 71               | CCA       |                |               | 8                         |
| ND6                       | +      | 9810-10283  | 474              |           | ATA            | TAA           | -1                        |
| Cyt <i>b</i>              | +      | 10283-11416 | 1137             |           | ATG            | TAA           | -1                        |
| tRNA <sup>Ser2</sup>      | +      | 11416-11483 | 68               | TCA       |                |               | -4                        |
| ND1                       | -      | 11480-12449 | 970              |           | ATA            | T             | 3                         |
| tRNA <sup>Leu1(CUA)</sup> | -      | 12453-12527 | 75               | CTA       |                |               | 0                         |
| 16S rRNA                  | -      | 12528-13855 | 1328             |           |                |               | 0                         |
| tRNA <sup>Val</sup>       | -      | 13856-13923 | 68               | GTA       |                |               | 0                         |
| 12S rRNA                  | -      | 13924-14719 | 806              |           |                |               | 0                         |
| CR                        |        | 14720-17005 | 2286             |           |                |               |                           |
