# Supplementary material for: Three Complete Mitochondrial Genomes of Orestes guangxiensis, Peruphasma schultei, and Phryganistria guangxiensis (Insecta: Phasmatodea) and Their Phylogeny
Source: MDPI journal article supplement (doi:10.3390/insects12090779), 2021-08-31
Supplement: s1 [file s1]

Table S7. Codon numbers and relative synonymous codon usage in mitochondrial protein coding genes of *O. guangxiensis* (OG), *Pe. schultei* (PS) and *Ph. guangxiensis* (PG).

| Codon  | Count |     |     | RSCU |      |      | Codon  | Count |     |     | RSCU |      |      |
|--------|-------|-----|-----|------|------|------|--------|-------|-----|-----|------|------|------|
|        | OG    | PS  | PG  | OG   | PS   | PG   |        | OG    | PS  | PG  | OG   | PS   | PG   |
| UUU(F) | 284   | 293 | 288 | 1.62 | 1.72 | 1.69 | GCG(A) | 5     | 3   | 2   | 0.16 | 0.1  | 0.07 |
| UUC(F) | 66    | 48  | 52  | 0.38 | 0.28 | 0.31 | UAU(Y) | 143   | 161 | 163 | 1.68 | 1.74 | 1.86 |
| UUA(L) | 325   | 345 | 354 | 3.98 | 4.11 | 4.26 | UAC(Y) | 27    | 24  | 12  | 0.32 | 0.26 | 0.14 |
| UUG(L) | 59    | 58  | 53  | 0.72 | 0.69 | 0.64 | CAU(H) | 49    | 56  | 56  | 1.44 | 1.75 | 1.65 |
| CUU(L) | 34    | 42  | 42  | 0.42 | 0.5  | 0.51 | CAC(H) | 19    | 8   | 12  | 0.56 | 0.25 | 0.35 |
| CUC(L) | 4     | 3   | 1   | 0.05 | 0.04 | 0.01 | CAA(Q) | 59    | 56  | 61  | 1.84 | 1.81 | 1.91 |
| CUA(L) | 60    | 43  | 46  | 0.73 | 0.51 | 0.55 | CAG(Q) | 5     | 6   | 3   | 0.16 | 0.19 | 0.09 |
| CUG(L) | 8     | 13  | 3   | 0.1  | 0.15 | 0.04 | AAU(N) | 150   | 149 | 158 | 1.56 | 1.54 | 1.62 |
| AUU(I) | 279   | 333 | 334 | 1.63 | 1.79 | 1.74 | AAC(N) | 42    | 45  | 37  | 0.44 | 0.46 | 0.38 |
| AUC(I) | 64    | 39  | 51  | 0.37 | 0.21 | 0.26 | AAA(K) | 83    | 89  | 89  | 1.66 | 1.68 | 1.66 |
| AUA(M) | 343   | 299 | 328 | 1.83 | 1.81 | 1.83 | AAG(K) | 17    | 17  | 18  | 0.34 | 0.32 | 0.34 |
| AUG(M) | 31    | 32  | 31  | 0.17 | 0.19 | 0.17 | GAU(D) | 60    | 59  | 56  | 1.69 | 1.74 | 1.62 |
| GUU(V) | 84    | 81  | 83  | 1.73 | 1.81 | 1.94 | GAC(D) | 11    | 9   | 13  | 0.31 | 0.26 | 0.38 |
| GUC(V) | 6     | 5   | 5   | 0.12 | 0.11 | 0.12 | GAA(E) | 62    | 69  | 61  | 1.65 | 1.73 | 1.54 |
| GUA(V) | 87    | 84  | 77  | 1.79 | 1.88 | 1.8  | GAG(E) | 13    | 11  | 18  | 0.35 | 0.28 | 0.46 |
| GUG(V) | 17    | 9   | 6   | 0.35 | 0.2  | 0.14 | UGU(C) | 42    | 40  | 43  | 1.83 | 1.78 | 1.83 |
| UCU(S) | 100   | 104 | 98  | 2.37 | 2.39 | 2.43 | UGC(C) | 4     | 5   | 4   | 0.17 | 0.22 | 0.17 |
| UCC(S) | 12    | 15  | 4   | 0.28 | 0.34 | 0.1  | UGA(W) | 72    | 86  | 84  | 1.52 | 1.77 | 1.79 |
| UCA(S) | 100   | 107 | 102 | 2.37 | 2.46 | 2.53 | UGG(W) | 23    | 11  | 10  | 0.48 | 0.23 | 0.21 |
| UCG(S) | 5     | 7   | 3   | 0.12 | 0.16 | 0.07 | CGU(R) | 16    | 14  | 23  | 1.21 | 1.08 | 1.74 |
| CCU(P) | 52    | 69  | 58  | 1.54 | 2.11 | 1.69 | CGC(R) | 2     | 4   | 0   | 0.15 | 0.31 | 0    |
| CCC(P) | 14    | 5   | 17  | 0.41 | 0.15 | 0.5  | CGA(R) | 25    | 34  | 28  | 1.89 | 2.62 | 2.11 |
| CCA(P) | 61    | 48  | 58  | 1.81 | 1.47 | 1.69 | CGG(R) | 10    | 0   | 2   | 0.75 | 0    | 0.15 |
| CCG(P) | 8     | 9   | 4   | 0.24 | 0.27 | 0.12 | AGU(S) | 34    | 35  | 37  | 0.81 | 0.8  | 0.92 |
| ACU(T) | 76    | 71  | 63  | 1.49 | 1.36 | 1.21 | AGC(S) | 7     | 5   | 10  | 0.17 | 0.11 | 0.25 |
| ACC(T) | 26    | 19  | 24  | 0.51 | 0.36 | 0.46 | AGA(S) | 74    | 73  | 63  | 1.76 | 1.68 | 1.56 |
| ACA(T) | 99    | 118 | 116 | 1.94 | 2.26 | 2.22 | AGG(S) | 5     | 2   | 6   | 0.12 | 0.05 | 0.15 |
| ACG(T) | 3     | 1   | 6   | 0.06 | 0.02 | 0.11 | GGU(G) | 105   | 96  | 102 | 2.06 | 1.89 | 2    |
| GCU(A) | 59    | 54  | 54  | 1.83 | 1.8  | 1.83 | GGC(G) | 10    | 6   | 3   | 0.2  | 0.12 | 0.06 |
| GCC(A) | 16    | 4   | 10  | 0.5  | 0.13 | 0.34 | GGA(G) | 51    | 74  | 71  | 1    | 1.46 | 1.39 |
| GCA(A) | 49    | 59  | 52  | 1.52 | 1.97 | 1.76 | GGG(G) | 38    | 27  | 28  | 0.75 | 0.53 | 0.55 |
