# Supplementary material for: Three Complete Mitochondrial Genomes of Orestes guangxiensis, Peruphasma schultei, and Phryganistria guangxiensis (Insecta: Phasmatodea) and Their Phylogeny
Source: MDPI journal article supplement (doi:10.3390/insects12090779), 2021-08-31
Supplement: s1 [file s1]

Table S4. Location of features in the mtDNA of *Pe. schultei*

| Gene                      | Strand | Position    | Length<br>(nuc.) | Anticodon | Start<br>codon | Stop<br>codon | Intergenic<br>nucleotides |
|---------------------------|--------|-------------|------------------|-----------|----------------|---------------|---------------------------|
| tRNA <sup>Ile</sup>       | +      | 1-60        | 60               | ATC       |                |               | 13                        |
| tRNA <sup>Gln</sup>       | -      | 74-133      | 60               | CAA       |                |               | 0                         |
| tRNA <sup>Met</sup>       | +      | 134-203     | 70               | ATG       |                |               | 0                         |
| ND2                       | +      | 204-1223    | 1020             |           | ATT            | TAA           | 0                         |
| tRNA <sup>Trp</sup>       | +      | 1222-1286   | 65               | TGA       |                |               | -8                        |
| tRNA <sup>Cys</sup>       | -      | 1279-1343   | 65               | TGC       |                |               | 0                         |
| tRNA <sup>Tyr</sup>       | -      | 1344-1408   | 65               | TAC       |                |               | 0                         |
| COI                       | +      | 1409-2947   | 1539             |           | ATG            | TAA           | -5                        |
| tRNA <sup>Leu2(UUA)</sup> | +      | 2943-3007   | 65               | TTA       |                |               | 0                         |
| COII                      | +      | 3008-3677   | 670              |           | ATT            | T             | 0                         |
| tRNA <sup>Lys</sup>       | +      | 3678-3746   | 69               | AAG       |                |               | 0                         |
| tRNA <sup>Asp</sup>       | +      | 3747-3811   | 65               | GAC       |                |               | 0                         |
| ATP8                      | +      | 3812-3970   | 159              |           | ATC            | TAA           | -4                        |
| ATP6                      | +      | 3967-4641   | 675              |           | ATA            | TAA           | -1                        |
| COIII                     | +      | 4641-5429   | 789              |           | ATG            | TAA           | -1                        |
| tRNA <sup>Gly</sup>       | +      | 5429-5496   | 68               | GGA       |                |               | 0                         |
| ND3                       | +      | 5497-5848   | 352              |           | ATA            | T             | 0                         |
| tRNA <sup>Ala</sup>       | +      | 5849-5912   | 64               | GCA       |                |               | 0                         |
| tRNA <sup>Arg</sup>       | +      | 5913-5978   | 66               | CGA       |                |               | 2                         |
| tRNA <sup>Asn</sup>       | +      | 5981-6044   | 64               | AAC       |                |               | 0                         |
| tRNA <sup>Ser1</sup>      | +      | 6045-6112   | 68               | AGC       |                |               | 0                         |
| tRNA <sup>Glu</sup>       | +      | 6113-6176   | 64               | GAA       |                |               | -2                        |
| tRNA <sup>Phe</sup>       | -      | 6175-6239   | 65               | TTC       |                |               | 0                         |
| ND5                       | -      | 6240-7962   | 1723             |           | ATT            | T             | 0                         |
| tRNA <sup>His</sup>       | -      | 7963-8025   | 63               | CAC       |                |               | -1                        |
| ND4                       | -      | 8025-9356   | 1332             |           | ATG            | TAA           | -2                        |
| ND4L                      | -      | 9355-9640   | 286              |           | ATG            | TAA           | 2                         |
| tRNA <sup>Thr</sup>       | +      | 9643-9705   | 63               | ACA       |                |               | 0                         |
| tRNA <sup>Pro</sup>       | -      | 9706-9767   | 62               | CCA       |                |               | 1                         |
| ND6                       | +      | 9769-10245  | 477              |           | ATT            | TAA           | 5                         |
| Cyt <i>b</i>              | +      | 10251-11384 | 1134             |           | ATA            | TAG           | -2                        |
| tRNA <sup>Ser2</sup>      | +      | 11383-11448 | 66               | TCA       |                |               | -2                        |
| ND1                       | -      | 11447-12394 | 948              |           | ATT            | TAA           | 18                        |
| tRNA <sup>Leu1(CUA)</sup> | -      | 12413-12479 | 67               | CTA       |                |               | 0                         |
| 16S rRNA                  | -      | 12480-13760 | 1281             |           |                |               | 0                         |
| tRNA <sup>Val</sup>       | -      | 13761-13828 | 68               | GTA       |                |               | 0                         |
| 12S rRNA                  | -      | 13829-14602 | 774              |           |                |               | 0                         |
| CR                        | +      | 14603-15896 | 1294             |           |                |               |                           |
